# Supplementary material for: Flexible NAD+ Binding in Deoxyhypusine Synthase Reflects the Dynamic Hypusine Modification of Translation Factor IF5A
Source: MDPI journal article supplement (doi:10.3390/ijms21155509), 2020-07-31
Supplement: s1 [file s1]

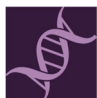

# Flexible NAD<sup>+</sup> binding in deoxyhypusine synthase reflects the dynamic hypusine modification of translation factor IF5A

Meirong Chen <sup>1,2,†</sup>, Zuoqi Gai <sup>1,†,‡</sup>, Chiaki Okada <sup>1,§</sup>, Yuxin Ye <sup>1,||</sup>, Jian Yu <sup>1</sup> and Min Yao <sup>1,\*</sup>

<sup>1</sup> Faculty of Advanced Life Science, Hokkaido University, Sapporo 060-0810, Japan; chenmr1987@163.com (M.C.); gaizuoqi@126.com (Z.G.); chiaki@hoku-iryō-u.ac.jp (C.O.); yeyx@pkusz.edu.cn (Y.Y.); yu@castor.sci.hokudai.ac.jp (J.Y.)

<sup>2</sup> College of Food Science and Technology, Nanjing Agricultural University, Nanjing 210095, China

<sup>†</sup> These authors contribute equally to this work.

<sup>‡</sup> The present address: School of Food Science and Engineering, Foshan University, Foshan 528225, China

<sup>§</sup> The present address: School of Pharmaceutical Sciences, Health Sciences University of Hokkaido, Ishikari-Tobetsu, 061-0293, Japan

<sup>||</sup> The present address: School of Chemical Biology and Biotechnology, State Key Laboratory of Chemical Oncogenomics, Peking University Shenzhen Graduate School, 518055 Shenzhen, China

\* Correspondence: Correspondence: yao@castor.sci.hokudai.ac.jp; Tel./Fax: +81-11-706-4481.

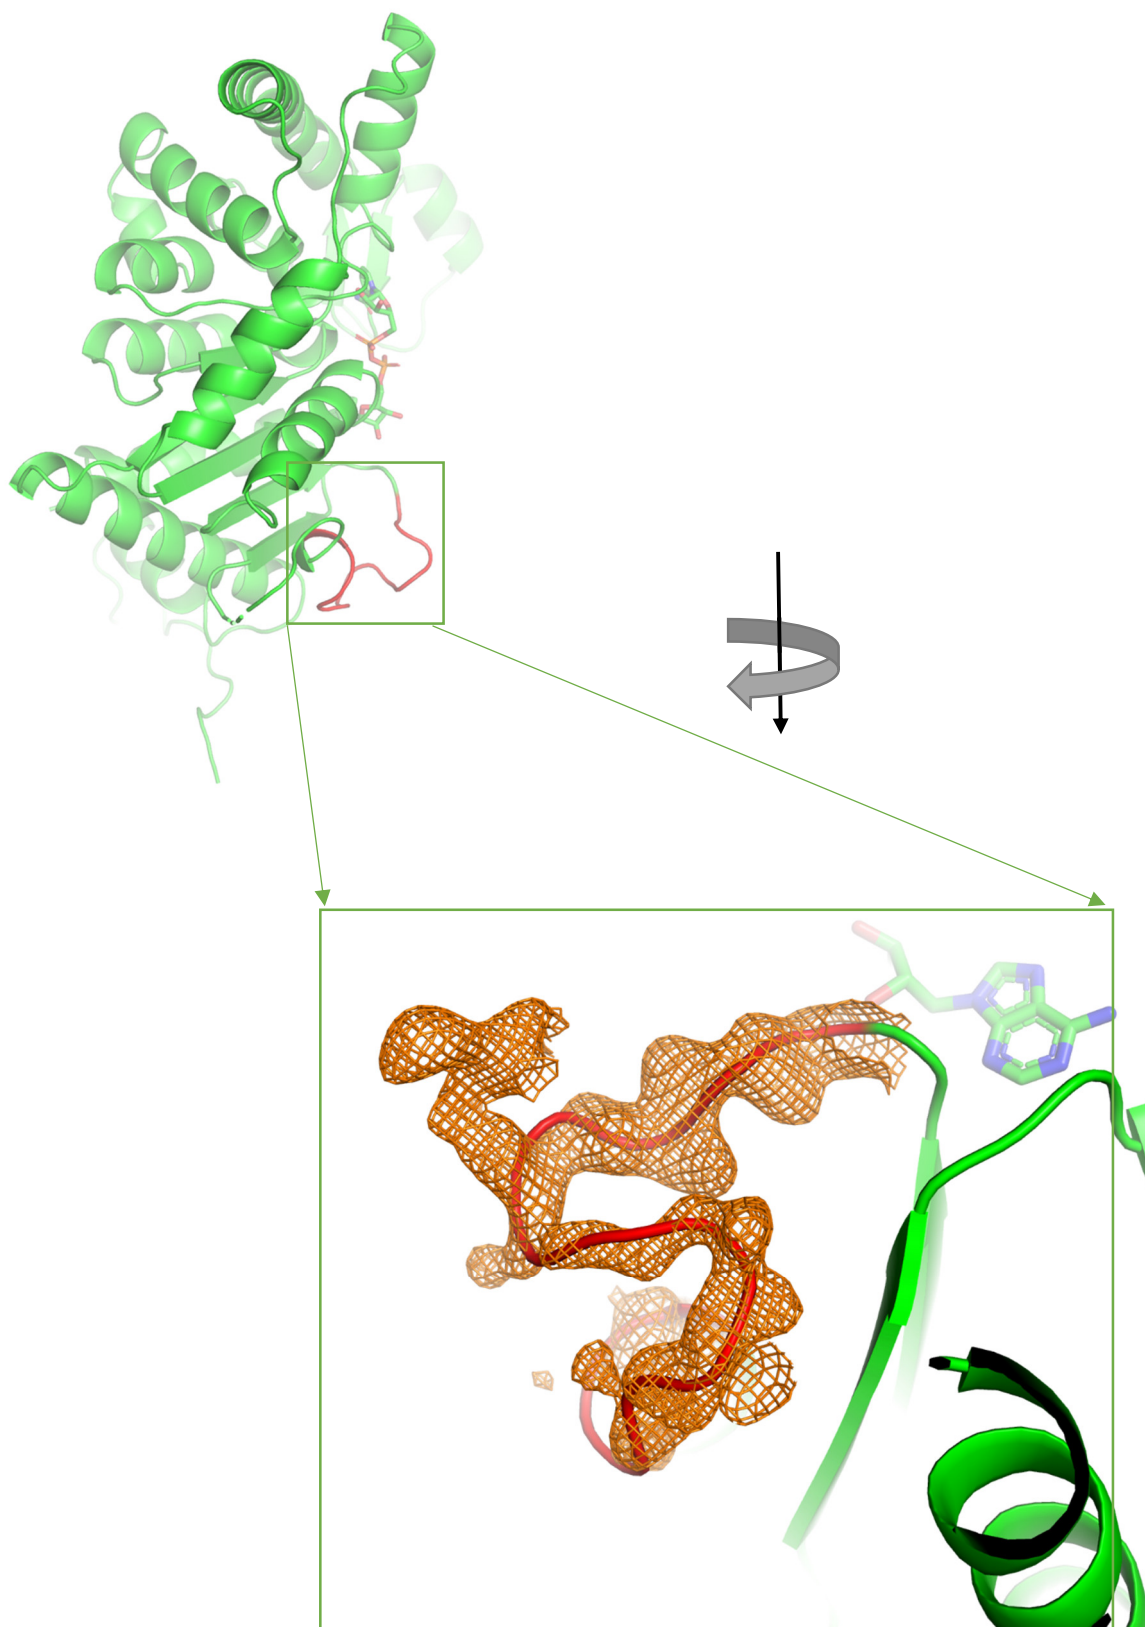

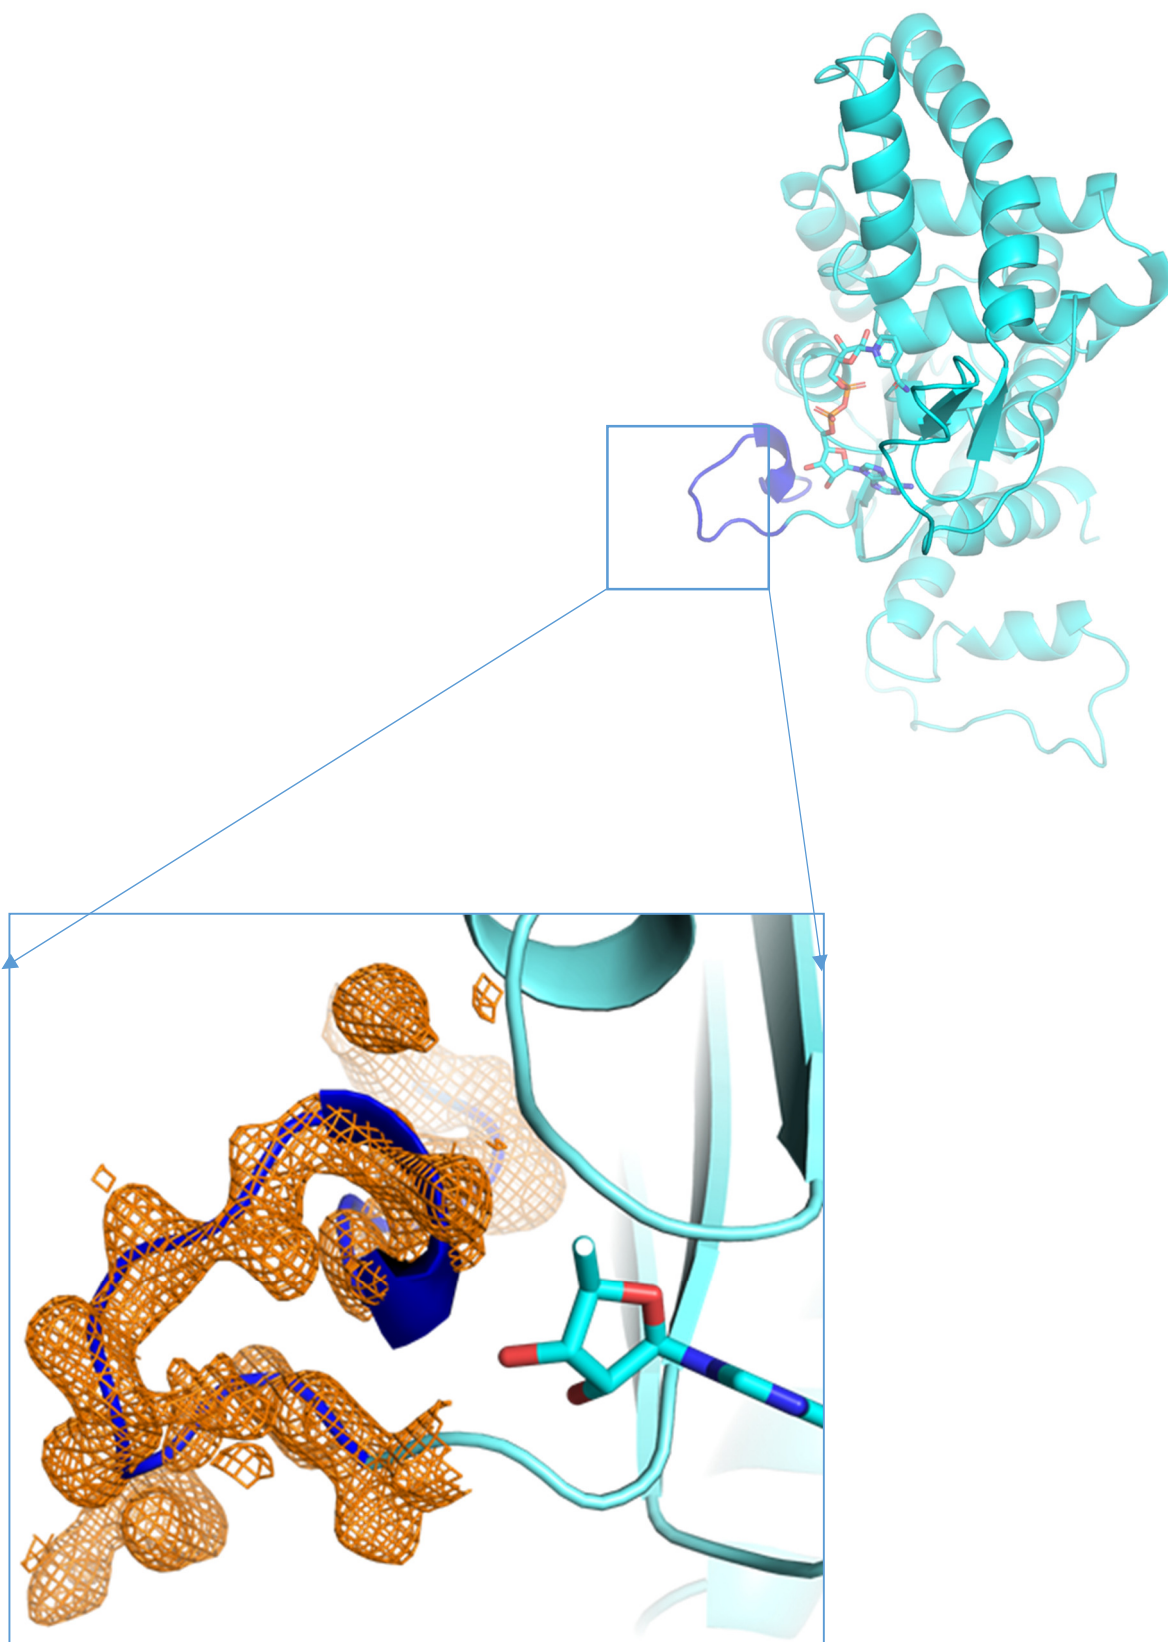

**Figure S1.** The loop region (V288-P299) in two different conformations (red and blue) in molA (green) and molD (cyan), respectively, with the  $2F_o-F_c$  density map contoured at the  $1\sigma$  level ( $0.2654e/\text{\AA}^3$ ) (orange).

(A)

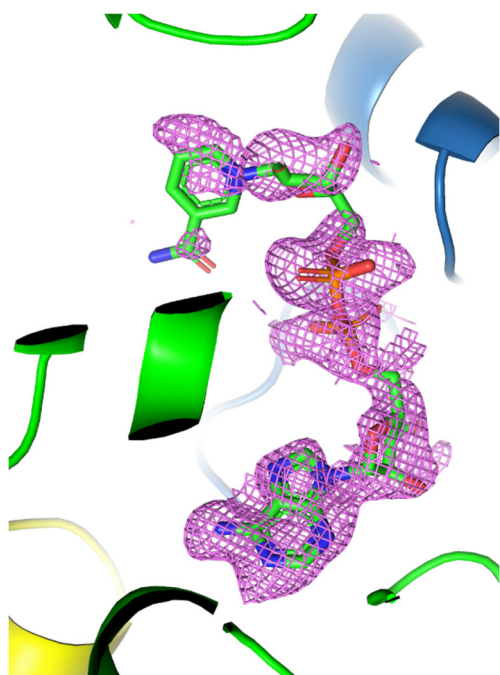

(A)

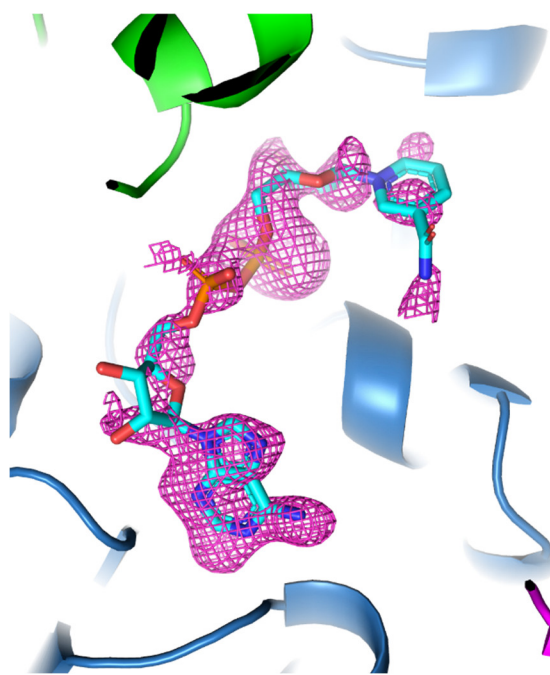

(B)

**Figure S2.** The NAD<sup>+</sup> molecules in molA (A) and molD (B) with the *F<sub>o</sub>-F<sub>c</sub>* omit map contoured at the 2σ level (purple).
